# Supplementary material for: Multispectral fluorescence imaging of EGFR and PD-L1 for precision detection of oral squamous cell carcinoma: a preclinical and clinical study
Source: PubMed Central journal article supplement (PMC11346054; doi:10.1186/s12916-024-03559-w), 2024-08-26
Supplement: 12916_2024_3559_MOESM2_ESM.pdf [file 12916_2024_3559_MOESM2_ESM.pdf]

Western blotting 1

HOK(1) HOK(2) CAL27(1) CAL27-Fluc(1) HSC3(1) CAL27(2) CAL27-Fluc(2) HSC3(2)

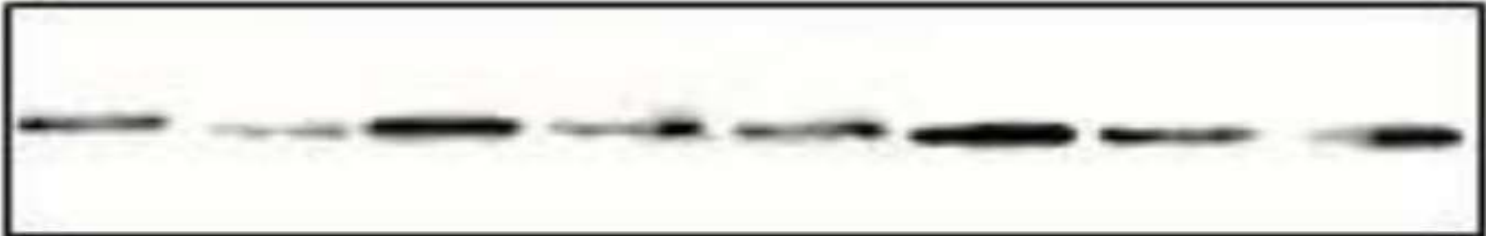

EGFR

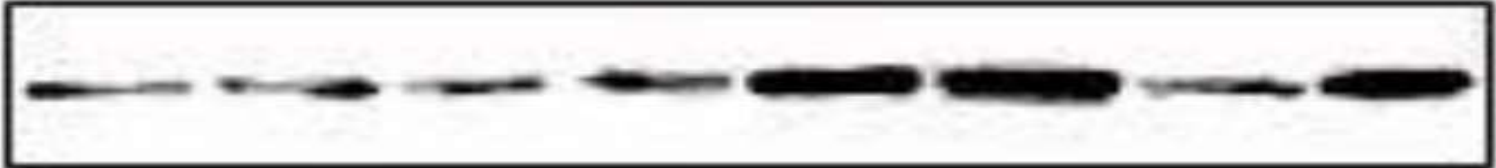

PD-L1

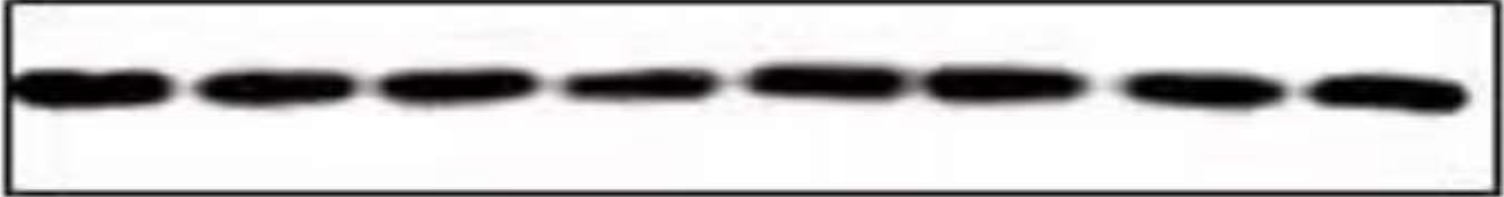

$\beta$ -Actin

# Western blotting 2

HOK(1) HOK(2) CAL27(1) CAL27-Fluc(1) HSC3(1) CAL27(2) CAL27-Fluc(2) HSC3(2)

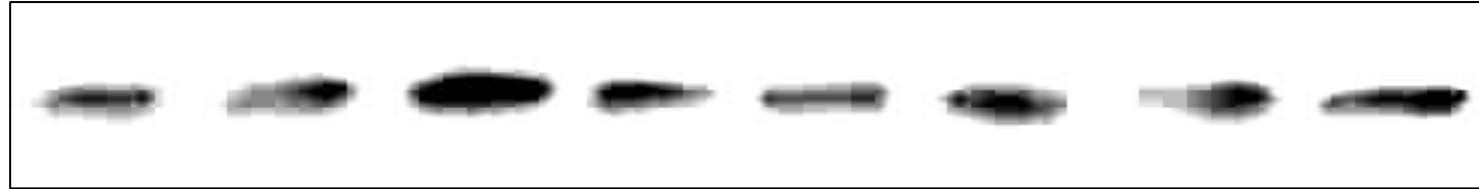

EGFR

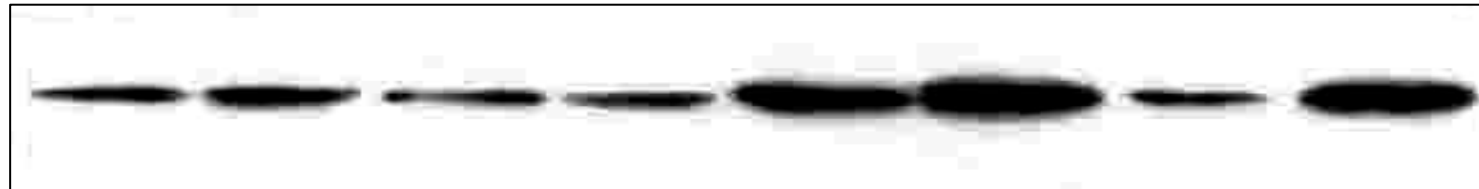

PD-L1

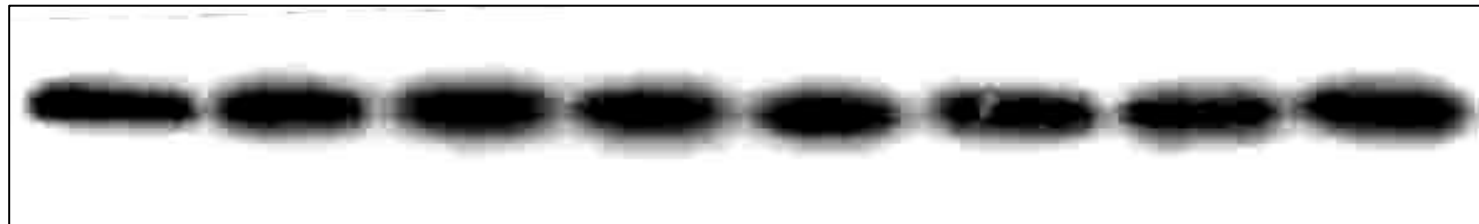

$\beta$ -Actin
